# Supplementary material for: Eco-friendly and low-cost removal of bromine from waste printed circuit board smelting ash by mechano-chemical leaching
Source: Royal Society of Chemistry journal article supplement (doi:10.1039/d2gc01902g), 2022-01-01
Supplement: d2gc01902g1.pdf [file d2gc01902g1.pdf]

## **Supporting Information**

### **Eco-friendly and low-cost removal of bromine from waste printed circuit boards smelting ash by mechano-chemical leaching**

Lijuan Zhao <sup>a,b</sup>, Qiang Deng <sup>a,b</sup>, Qijun Zhang <sup>a,b,\*</sup>, Zhe Tan <sup>a,b</sup>, Xiaoguang Zhang <sup>a,b</sup>,  
Minwei Song <sup>a,b</sup>, Wei Wang <sup>a,b</sup>, Ran Tao <sup>a,b</sup>, Zhenhuan Zhao <sup>c</sup>, De'an Pan <sup>a,b,\*</sup>

<sup>a</sup> Institute of Circular Economy, Beijing University of Technology, Beijing, 100124, P. R. China.

<sup>b</sup> Faculty of Materials and Manufacturing, Beijing University of Technology, Beijing, 100124, P. R. China.

<sup>c</sup> Department of Applied Chemistry, School of Advanced Materials and Nanotechnology, Xidian University, Xi'an 710126, P. R. China.

\* Corresponding Author: Fax: +86-10-67396234; Tel: +86-10-67396234; E-mail: zhangqijun@bjut.edu.cn (Qijun Zhang); 15801662924@139.com (De'an Pan)

Number of pages: 8

Number of figures: 5

Number of tables: 3

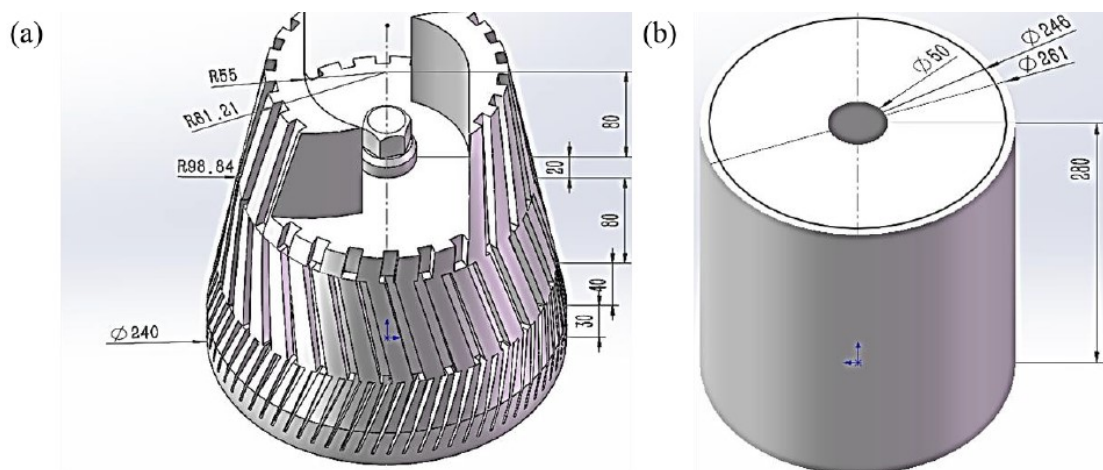

**Fig. S1.** The geometric model of the main structure of RS-RR: (a) rotor and (b) stator.

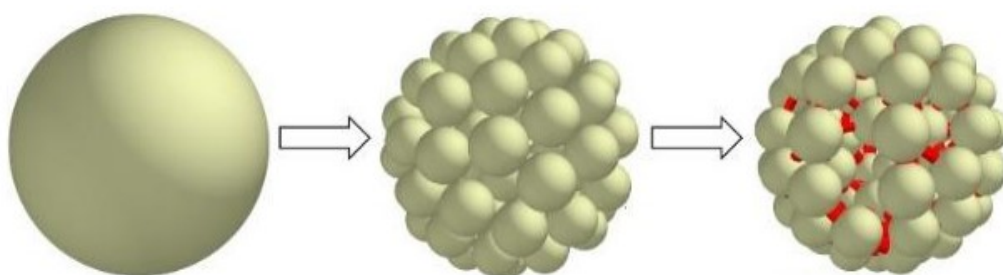

**Fig. S2.** The particle replacement model.

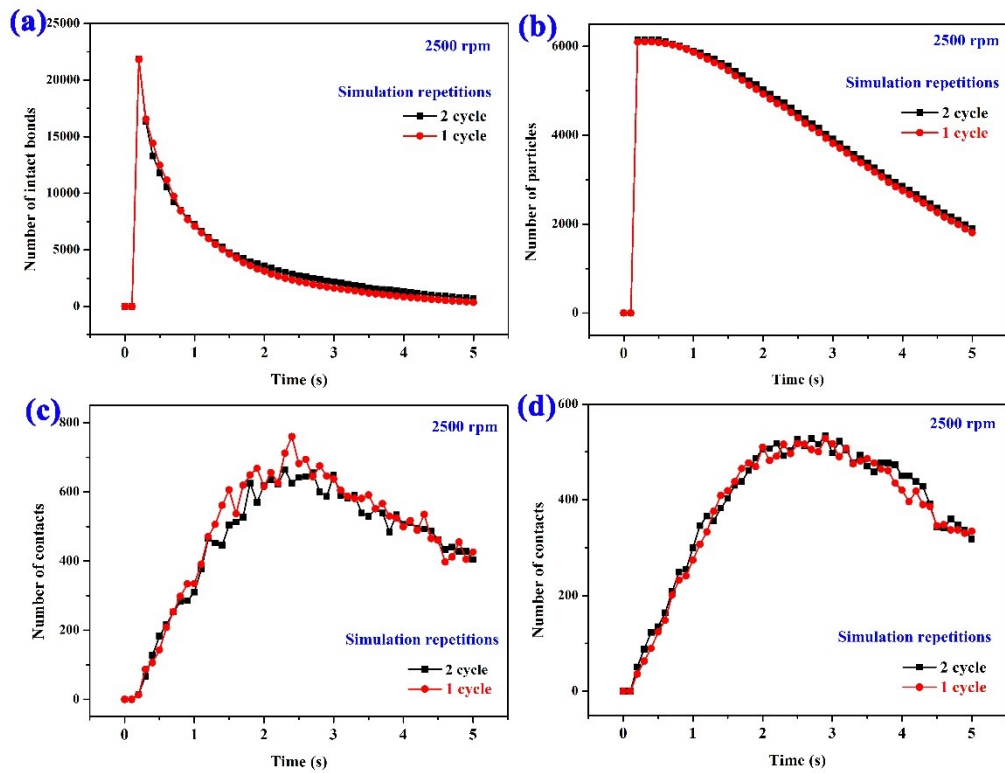

**Fig. S3.** Simulation duplicate data at 2,500rpm: (a) the number of intact bonds; (b) the number of fraction particles; (c) the number of particles in contact with the static grinding disc; (d) the number of particles in contact with the moving grinding disc.

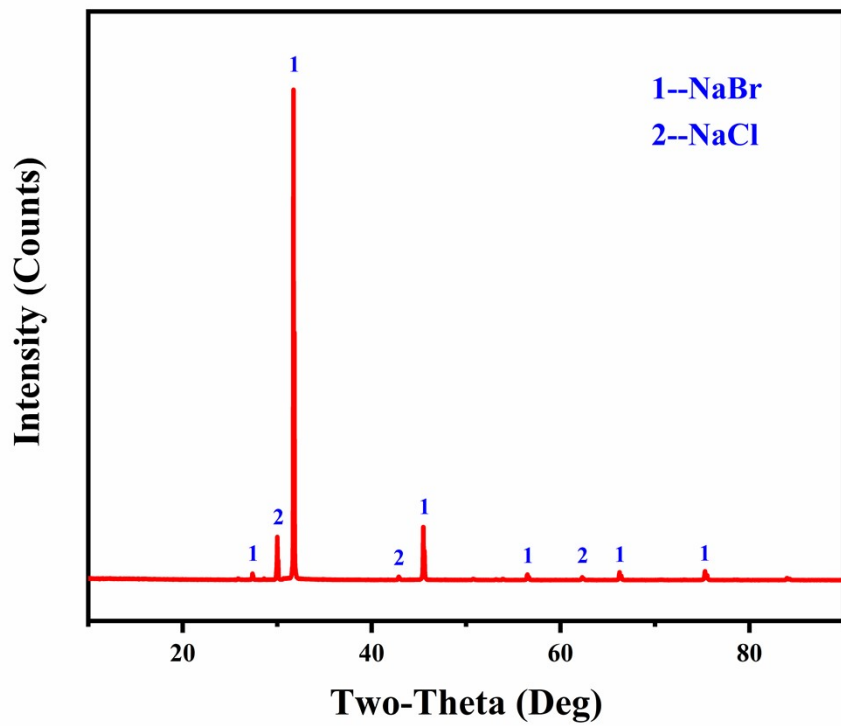

**Fig. S4.** The XRD patterns of mixed salt.

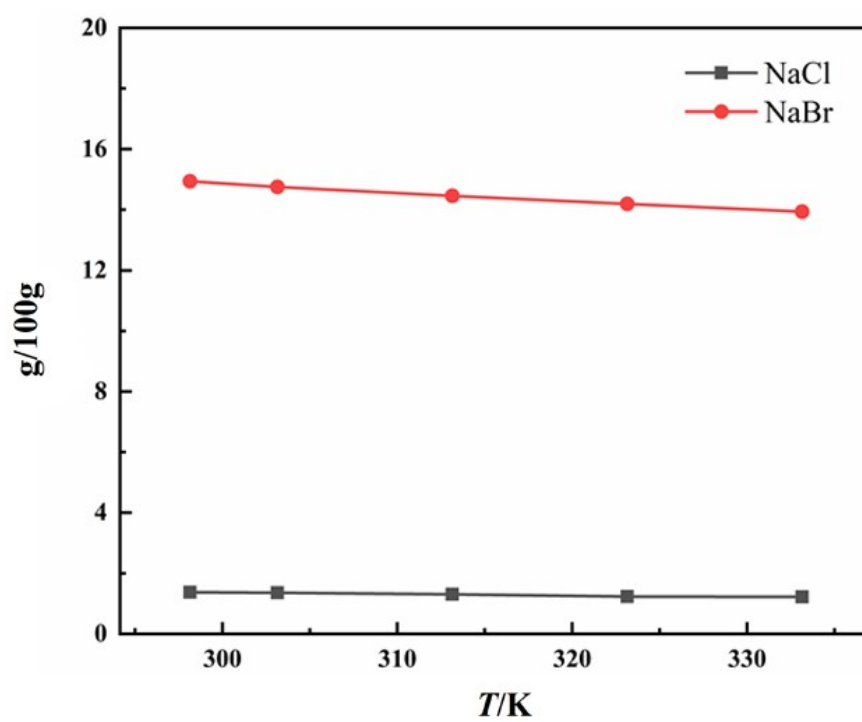

**Fig. S5.** Solubility of NaBr and NaCl in methanol.

**Table S1. Simulation conditions**

| EDEM                                         |                       |                                             |                        |
|----------------------------------------------|-----------------------|---------------------------------------------|------------------------|
| Time step (s)                                | $3.70 \times 10^{-7}$ | Poisson ratio                               | 0.3                    |
| Calculation time (s)                         | 5                     | Shear modulus (Pa) for particle             | $2.11 \times 10^{10}$  |
| Whole particle diameter (mm)                 | 20                    | Shear modulus (Pa) for contact media        | $1.01 \times 10^{11}$  |
| Fraction particle diameter (mm)              | 3                     | Coefficient of Restitution of particle      | 0.1                    |
| Particle density (kg/m <sup>3</sup> )        | 2,790                 | Coefficient of Static Friction of particle  | 0.545                  |
| Device material density (kg/m <sup>3</sup> ) | 7,890                 | Coefficient of Rolling Friction of particle | 0.01                   |
| Mesh size (mm)                               | 3                     | Cell number                                 | $1.54 \times 10^6$     |
| FLUENT                                       |                       |                                             |                        |
| Fluid density (kg/m <sup>3</sup> )           | 998.2                 | Dynamic viscosity (Pa·s)                    | $1.03 \times 10^{-3}$  |
| Fluid velocity (m/s)                         | 5                     | Cell number                                 | $1.69 \times 10^6$     |
| Turbulence intensity inlet (%)               | 5                     | Residual                                    | $1.0 \times 10^{-4}$   |
| Particle density (kg/m <sup>3</sup> )        | 1,200                 | Particle diameter (μm)                      | 50                     |
| Particle velocity inlet (m/s)                | 5                     | Particle flow rate (kg/s)                   | 0.0001                 |
| Cell number of mesh                          | 1,694,031             | Average element quality                     | 0.83454                |
| Gravity (m/s <sup>2</sup> )                  | 9.81                  | Minimum cell volume                         | $8.94 \times 10^{-13}$ |

**Table S2.** Percentage distribution table of fluid velocity in flow field at different rotation speeds

| 500 rpm       |       | 1,000 rpm     |       | 1,500 rpm     |       | 2,000 rpm     |       | 2,500 rpm     |       |
|---------------|-------|---------------|-------|---------------|-------|---------------|-------|---------------|-------|
| Velocity(m/s) | %     |
| 0-1.94        | 4.24  | 0-3.14        | 5.58  | 0-4.84        | 5.50  | 0-6.43        | 6.02  | 0-8.02        | 6.41  |
| 1.94-3.86     | 39.80 | 3.43-6.84     | 15.79 | 4.84-9.65     | 8.92  | 6.43-12.80    | 5.80  | 8.02-16.02    | 4.42  |
| 3.86-5.77     | 28.21 | 6.84-10.25    | 37.05 | 9.65-14.47    | 25.81 | 12.80-19.16   | 23.08 | 16.02-24.01   | 22.36 |
| 5.77-7.68     | 27.59 | 10.25-13.66   | 41.51 | 14.47-19.28   | 59.50 | 19.16-25.53   | 64.87 | 24.01-32.00   | 66.68 |
| 7.68-9.59     | 0.16  | 13.66-17.07   | 0.07  | 19.28-24.10   | 0.27  | 25.53-31.89   | 0.23  | 32.00-40.00   | 0.13  |

**Table S3.** Comparison of various technologies for dissolution of insoluble bromides in WPCBs-SA.

| Technologies                            | Insoluble bromides         | Optimal parameters                                                                                                                                       | Toxic gas emissions    | Br removal yield | Refs.     |
|-----------------------------------------|----------------------------|----------------------------------------------------------------------------------------------------------------------------------------------------------|------------------------|------------------|-----------|
| H <sub>2</sub> SO <sub>4</sub> roasting | CuBr, PbClBr               | Acid/WPCBs-SA of 0.8g/g, temperature of 316.89 °C, roasting time of 123.25 min                                                                           | HBr/Br/SO <sub>2</sub> | 98.97%           | 1,2       |
| NaOH leaching                           | CuBr, PbBr <sub>2</sub>    | NaOH concentration of 2 mol/L, L/S ratio of 12:1 mL/g, stirring rate of 600 rpm, temperature of 70 °C, leaching time of 120 min                          | \                      | 96.39%           | 3         |
| Mechano-chemical leaching               | PbBr <sub>2</sub> , PbClBr | NaOH concentration of 4.5 mol/L, L/S ratio of 3:1 mL/g, rotation speed of 2500 rpm, grinding disc gap of 3 μm, leaching time of 20 min, room temperature | \                      | 96.76%           | This work |

## References

- [1] Liu, G.; Wu, Y.; Li, B.; Pan, D. A.; Yang, F.; Pan, J.; Wang, Y.; Cheng, N. A new facile process to remove Br<sup>-</sup> from waste printed circuit boards smelting ash: Thermodynamic analysis and process parameter optimization. *J. Clean. Prod.* 2020, 254, 120176.
- [2] Wu, Y.; Liu, G.; Pan, D. A.; Yuan, H.; Li, B. A new mechanism and kinetic analysis for the efficient conversion of inorganic bromide in waste printed circuit board smelting ash via traditional sulfated roasting. *J. Hazard. Mater.* 2021, 413, 125394.
- [3] Deng, Q.; Pan, D.; Liu, G.; Yang, F.; Pan, J. Leaching Br from high bromine containing circuit board smelting flue dust by sodium hydroxide solution: thermodynamics and kinetics study. *Journal of Materials Research and Technology* 2020, 9, 8675-8684.
